# Supplementary material for: NiCo2S4/carbon nanotube nanocomposites with a chain-like architecture for enhanced supercapacitor performance
Source: Royal Society of Chemistry journal article supplement (doi:10.1039/c6ce01556e), 2016-01-01
Supplement: c6ce01556e1.pdf [file c6ce01556e1.pdf]

## Supporting information

### **NiCo<sub>2</sub>S<sub>4</sub>/Carbon Nanotube Nanocomposites with Chain-like Architecture for Enhanced Supercapacitor Performance**

**Yang Lu,<sup>a,b</sup> Zongwen Zhang,<sup>c</sup> Xianming Liu,<sup>d</sup> Weixiao Wang,<sup>a,b</sup> Tao Peng,<sup>a,b</sup> Pengfei Guo,<sup>a,b</sup> Haibin Sun<sup>a,b</sup> Hailong Yan,<sup>a,b</sup> Yongsong Luo,<sup>\*a,b</sup>**

<sup>a</sup>*School of Physics and Electronic Engineering, Xinyang Normal University, Xinyang 464000, P. R. China.*

<sup>b</sup>*Key Laboratory of Advanced Micro/Nano Functional Materials, Xinyang Normal University, Xinyang 464000, P. R. China.*

<sup>c</sup>*Instrumental Analysis and Research Center, Xinyang Normal University, Xinyang 464000, P. R. China.*

<sup>d</sup>*College of Chemistry and Chemical Engineering, Luoyang Normal University, Luoyang 471022, P. R. China.*

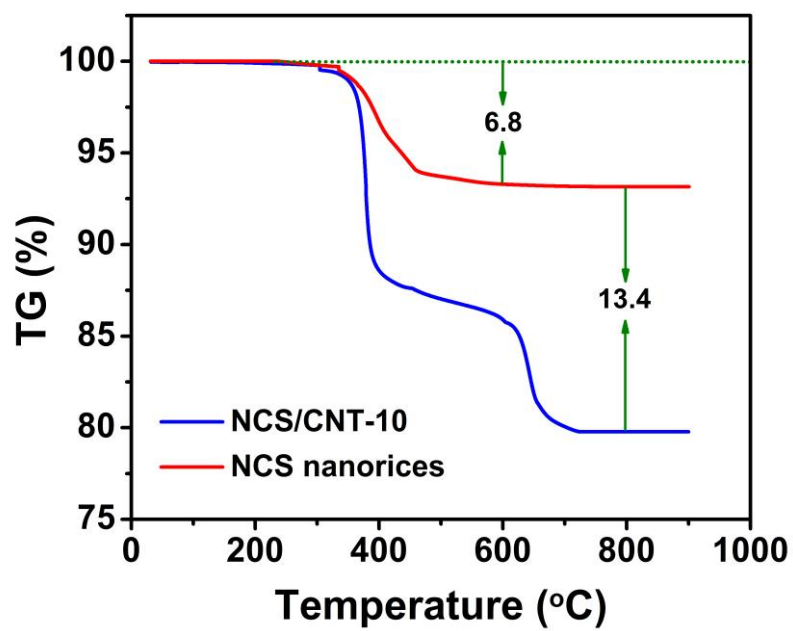

**Fig. S1** TG curves of NCS/CNT-10 composite and NCS nanorices in air at a heating rate of 10 °C min<sup>-1</sup>.

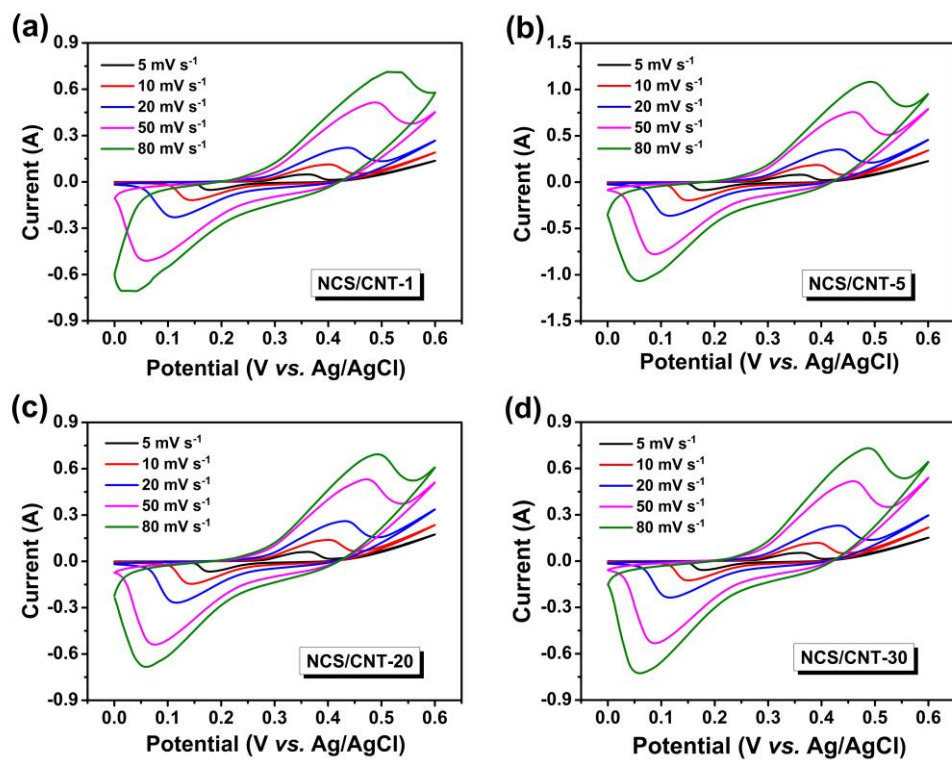

**Fig. S2** CV curves at different scan rates recorded from NCS/CNT nanocomposites with different adding amount of CNT: (a) NCS/CNT-1; (b) NCS/CNT-5; (c) NCS/CNT-20; (d) NCS/CNT-30.

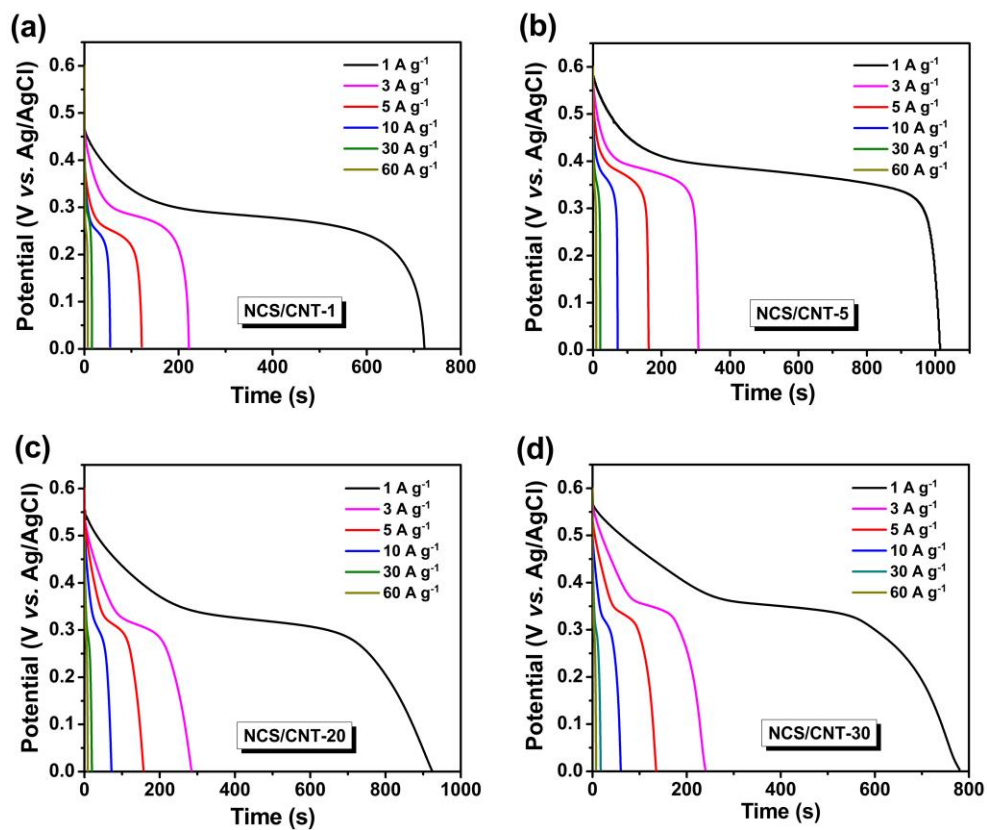

**Fig. S3** CD curves at different current densities recorded from NCS/CNT nanocomposites with different adding amount of CNT: (a) NCS/CNT-1; (b) NCS/CNT-5; (c) NCS/CNT-20; (d) NCS/CNT-30.

**Table S1** Comparison of the key performance characteristics of different NiCo<sub>2</sub>S<sub>4</sub>-based electrodes for supercapacitors.

| Sample                                                        | Specific capacitance                          | Rate retention | Current range           | Ref.     |
|---------------------------------------------------------------|-----------------------------------------------|----------------|-------------------------|----------|
| NiCo <sub>2</sub> S <sub>4</sub> nanotubes                    | 933 F g <sup>-1</sup> (1 A g <sup>-1</sup> )  | 58.9 %         | 1-5 A g <sup>-1</sup>   | 1        |
| Urchin-like NiCo <sub>2</sub> S <sub>4</sub>                  | 1025 F g <sup>-1</sup> (1 A g <sup>-1</sup> ) | 77.3 %         | 1-20 A g <sup>-1</sup>  | 2        |
| NiCo <sub>2</sub> S <sub>4</sub> nanoparticles on graphene    | 1708 F g <sup>-1</sup> (1 A g <sup>-1</sup> ) | 68 %           | 1-40 A g <sup>-1</sup>  | 3        |
| NiCo <sub>2</sub> S <sub>4</sub> microsphere/ acetylene black | 768 F g <sup>-1</sup> (2 A g <sup>-1</sup> )  | 70.3 %         | 2-100 A g <sup>-1</sup> | 4        |
| CoNi <sub>2</sub> S <sub>4</sub> /CNT                         | 2094 F g <sup>-1</sup> (1 A g <sup>-1</sup> ) | 72 %           | 1-10 A g <sup>-1</sup>  | 5        |
| CoNi <sub>2</sub> S <sub>4</sub> /graphene                    | 2009 F g <sup>-1</sup> (1 A g <sup>-1</sup> ) | 49.8 %         | 1-20 A g <sup>-1</sup>  | 6        |
| NiCo <sub>2</sub> S <sub>4</sub> -RGO                         | 1451 F g <sup>-1</sup> (3 A g <sup>-1</sup> ) | 52.3 %         | 3-20 A g <sup>-1</sup>  | 7        |
| NiCo <sub>2</sub> S <sub>4</sub> /CNT                         | 2210 F g <sup>-1</sup> (1 A g <sup>-1</sup> ) | 72 %           | 1-60 A g <sup>-1</sup>  | Our work |

- 1 H. Wan, J. Jiang, J. Yu, K. Xu, L. Miao, L. Zhang, H. Chen and Y. Ruan, *CrystEngComm*, 2013, **15**, 7649.
- 2 H. Chen, J. Jiang, L. Zhang, H. Wan, T. Qi and D. Xia, *Nanoscale*, 2013, **5**, 8879.
- 3 Y. H. Xiao, D. C. Su, X. Z. Wang, L. M. Zhou, S. D. Wu, F. Li and S. M. Fang, *Electrochim. Acta*, 2015, **176**, 44.
- 4 Y. R. Zhu, X. B. Ji, Z. B. Wu and Y. Liu, *Electrochim. Acta*, 2015, **186**, 562.
- 5 Z. H. Ai, Z. H. Hu, Y. F. Liu, M. X. Fan and P. P. Liu, *New J. Chem.*, 2016, **40**, 340.
- 6 W. Du, Z. Wang, Z. Zhu, S. Hu, X. Zhu, Y. Shi, H. Pang and X. Qian, *J. Mater. Chem. A*, 2014, **2**, 9613.
- 7 S. J. Peng, L. L. Li, C. C. Li, H. T. Tan, R. Cai, H. Yu, S. Mhaisalkar, M. Srinivasan, S. Ramakrishna and Q. Y. Yan, *ChemComm*, 2013, **49**, 10178.

**Table S2** Charge transfer resistance ( $R_{ct}$ ) and internal resistance ( $R_s$ ) of synthesized samples.

| <b>Sample</b>     | <b><math>R_{ct}</math> (<math>\Omega</math>)</b> | <b><math>R_s</math> (<math>\Omega</math>)</b> |
|-------------------|--------------------------------------------------|-----------------------------------------------|
| <b>NCS/CNT-1</b>  | 1.328                                            | 0.623                                         |
| <b>NCS/CNT-5</b>  | 0.491                                            | 0.199                                         |
| <b>NCS/CNT-10</b> | 0.268                                            | 0.092                                         |
| <b>NCS/CNT-20</b> | 0.637                                            | 0.175                                         |
| <b>NCS/CNT-30</b> | 1.004                                            | 0.671                                         |
| <b>NCS</b>        | 0.371                                            | 0.912                                         |
